# Supplementary material for: Palladium-catalyzed selectiveN-allylation of indoles assisted by PEG–water system
Source: Royal Society of Chemistry journal article supplement (doi:10.1039/c9nj02335f), 2019-01-01
Supplement: c9nj02335f1.pdf [file c9nj02335f1.pdf]

## Supporting Information

### Palladium-Catalyzed Selective *N*-Allylation of Indoles assisted by PEG-Water System

Bai-Jing Peng , Yi-Ting Huang , Ferenc Fülöp, I-Ling Lin and Shyh-Chyun Yang \*

School of Pharmacy, College of Pharmacy, Kaohsiung Medical University, Kaohsiung 807, Taiwan,

Email: scyang@kmu.edu.tw

### *Table of Contents*

|                                                                                                                                                                                                                     |     |
|---------------------------------------------------------------------------------------------------------------------------------------------------------------------------------------------------------------------|-----|
| 1. General consideration.....                                                                                                                                                                                       | S2  |
| 2. General procedure .....                                                                                                                                                                                          | S2  |
| 3. Characterization data of compound.....                                                                                                                                                                           | S3  |
| 4. <sup>1</sup> H and <sup>13</sup> C NMR spectra <b>3a</b> , <b>4a</b> , <b>3b</b> , <b>4b</b> , <b>3c</b> , <b>4c</b> , <b>3d</b> , <b>3e</b> , <b>3f</b> , <b>3g</b> , <b>3h</b> , <b>3i</b> and <b>3j</b> ..... | S9  |
| 5. Reference.....                                                                                                                                                                                                   | S22 |

## General consideration

Reagents were obtained from Acros Organics (Geel, Belgium), Tokyo Chemical Industry (Tokyo, Japan), Sigma-Aldrich (St. Louis, USA), and Alfa-Aesar (Ward Hill, MA, USA), and used without further purification. All reactions were carried out under a nitrogen atmosphere. Solvents were dried and distilled by known methods. Column chromatography was performed on silica gel. IR absorption spectra were recorded on Shimadzu IR-27G and Perkin-Elmer System 2000FT-IR spectrophotometers. Proton nuclear magnetic resonance ( $^1\text{H-NMR}$ , 400 MHz) and carbon-13 NMR spectra were measured with Varian Unity-400 spectrometers. Carbon multiplicities were obtained from DEPT experiments. Chemical shifts ( $\delta$ ) and coupling constants (Hz) were measured with respect to TMS or chloroform- $d_1$ . Mass and high-resolution mass spectra (HRMS) were taken on a Hewlett-Packard 5989A or JEOL JMS D-100 instrument, with a direct inlet system.

## General procedure

A mixture of 1,2,3,4-tetrahydrocarbazole (**1a**, 1 mmol), allyl acetate (**2a**, 2 mmol), PEG-6000 (1 g),  $\text{Pd}(\text{OAc})_2$  (9.7 mg, 0.025 mmol), and  $(2\text{-Furyl})_3\text{P}$  (36.5 mg, 0.05 mmol) in distilled water (5 mL) were refluxed for 2 h. After cooling, the solvent was distilled under reduced pressure. Column chromatography (*n*-hexane/EtOAc = 4:1) of the residue only afforded 143 mg (68%) of **3a** and 40 mg (19%) of **4a**, respectively.

Products **3a**<sup>1</sup>, **4a**<sup>1</sup>, **3b**<sup>1</sup>, **4b**<sup>1</sup>, **3c**<sup>1</sup>, **4c**<sup>1</sup>, **3d**<sup>2</sup>, **3e**<sup>3</sup>, **3f**<sup>1</sup>, **3g**<sup>1</sup>, **3h**<sup>4</sup>, **3i**<sup>4</sup> and **3j**<sup>1</sup> are known.

## Characterization data of compound

### 3a: *N*-allyl-1,2,3,4-tetrahydrocarbazole

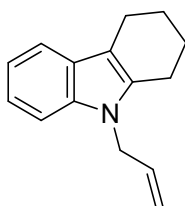

Yellow oil. IR (KBr):  $\nu$  1644, 1613, 1464  $\text{cm}^{-1}$ .  $^1\text{H-NMR}$  (400 MHz,  $\text{CDCl}_3$ ):  $\delta$  7.47 (d,  $J = 7.6$  Hz, 1H, ArH), 7.22 (d,  $J = 8.4$  Hz, 1H, ArH), 7.12 (ddd,  $J = 8.4, 6.8, 0.8$  Hz, 1H, ArH), 7.06 (ddd,  $J = 8.4, 6.8, 0.8$  Hz, 1H, ArH), 5.90 (ddt,  $J = 17.2, 10.4, 4.8$  Hz, 1H, vinyl H), 5.09 (ddt,  $J = 10.4, 1.6, 1.6$  Hz, 1H, vinyl H), 4.88 (ddt,  $J = 17.2, 1.6, 1.6$  Hz, 1H, vinyl H), 4.62 (dt,  $J = 4.8, 1.6$  Hz, 2H,  $\text{NCH}_2$ ), 2.73 (tt,  $J = 6.0, 1.6$  Hz, 2H,  $\text{CH}_2$ ), 2.67 (tt,  $J = 6.0, 1.6$  Hz, 2H,  $\text{CH}_2$ ), 1.82-1.96 (m, 4H,  $\text{CH}_2 \times 2$ );  $^{13}\text{C-NMR}$  (100 MHz,  $\text{CDCl}_3$ ):  $\delta$  136.2 (C), 135.4 (C), 133.8 (CH), 127.4 (C), 120.5 (CH), 118.7 (CH), 117.7 (CH), 116.0 ( $\text{CH}_2$ ), 109.5 (C), 108.8 (CH), 45.0 ( $\text{CH}_2$ ), 23.2 ( $\text{CH}_2$ ), 23.2 ( $\text{CH}_2$ ), 22.0 ( $\text{CH}_2$ ), 21.1 ( $\text{CH}_2$ ). EI-MS:  $m/z$  211 ( $\text{M}^+$ ), 196, 183, 168, 154, 142, 128, 115, 89, 77, 63, 51. EI-HRMS calcd for  $\text{C}_{15}\text{H}_{17}\text{N}$ : 211.1361. Found: 211.1363.

### 4a: *N*-allyl-1,2,3,4-tetrahydrocarbazole

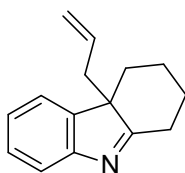

Yellow oil. IR (KBr):  $\nu$  1711, 1641, 1617, 1451  $\text{cm}^{-1}$ .  $^1\text{H-NMR}$  (400 MHz,  $\text{CDCl}_3$ ):  $\delta$  7.58 (d,  $J = 7.6$  Hz, 1H, ArH), 7.31 (ddd,  $J = 7.6, 7.2, 1.2$  Hz, 1H, ArH), 7.30 (dd,  $J = 7.6, 1.2$  Hz, 1H, ArH), 7.17 (ddd,  $J = 7.6, 7.2, 1.2$  Hz, 1H, ArH), 5.17 (ddt,  $J = 17.2, 10.0, 6.8$  Hz, 1H, vinyl H), 4.94 (ddt,  $J = 17.2, 2.0, 1.2$  Hz, 1H, vinyl H), 4.86 (ddt,  $J = 10.0, 2.0, 1.2$  Hz, 1H, vinyl H), 2.85-2.91 (m, 1H, CH), 2.62 (dt,  $J = 13.2, 6.4$  Hz, 1H, CH), 2.54-2.59 (m, 1H, CH), 2.54 (dt,  $J = 13.2, 5.6$  Hz, 1H, CH), 2.36 (ddt,  $J = 13.2, 3.2, 2.8$  Hz, 1H, CH), 2.18-2.24 (m, 1H, CH), 1.83 (tq,  $J = 13.6, 4.0$  Hz, 1H, CH), 1.66-1.72 (m, 1H, CH), 1.43 (tq,  $J = 13.6, 4.0$  Hz, 1H, CH), 1.16 (dt,  $J = 13.6, 4.0$  Hz, 1H, CH);  $^{13}\text{C-NMR}$  (100 MHz,  $\text{CDCl}_3$ ):  $\delta$  188.9 (C), 154.8 (C), 144.6 (C), 132.1 (CH), 127.6 (CH), 124.7 (CH), 121.9 (CH), 120.1 (CH), 118.0 ( $\text{CH}_2$ ), 57.6 (C), 37.6 ( $\text{CH}_2$ ), 37.0 ( $\text{CH}_2$ ), 30.1 ( $\text{CH}_2$ ), 28.8 ( $\text{CH}_2$ ), 21.1 ( $\text{CH}_2$ ). EI-MS:  $m/z$  211 ( $\text{M}^+$ ), 196, 183, 170, 168, 154, 142, 128, 115, 89, 77, 63, 51. EI-HRMS calcd for  $\text{C}_{15}\text{H}_{17}\text{N}$ : 211.1361. Found: 211.1358.

### 3b: *N*-(But-2-en-1-yl)-1, 2, 3, 4-tetrahydrocarbazole

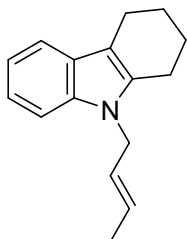

Yellow oil. IR (KBr):  $\nu$  1653, 1611, 1462  $\text{cm}^{-1}$ .  $^1\text{H-NMR}$  (400 MHz,  $\text{CDCl}_3$ ):  $\delta$  7.46 (dd,  $J = 8.0, 1.2$  Hz, 1H, ArH), 7.24 (dd,  $J = 8.0, 1.2$  Hz, 1H, ArH), 7.12 (ddd,  $J = 8.0, 7.2, 1.2$  Hz, 1H, ArH), 7.05 (ddd,  $J = 8.0, 7.2, 1.2$  Hz, 1H, ArH), 5.40-5.61 (m, 2H, vinyl H), 4.53-4.55 (m, 2H,  $\text{NCH}_2$ ), 2.73 (tt,  $J = 6.0, 1.6$  Hz, 2H,  $\text{CH}_2$ ), 2.68 (tt,  $J = 6.0, 1.6$  Hz, 2H,  $\text{CH}_2$ ), 1.80-1.95 (m, 4H,  $\text{CH}_2 \times 2$ ), 1.63 (dd,  $J = 6.4, 1.2$  Hz, 3H,  $\text{CH}_3$ );  $^{13}\text{C-NMR}$  (100 MHz,  $\text{CDCl}_3$ ):  $\delta$  136.0 (C), 135.3 (C), 127.3 (C), 126.7 (CH), 120.4 (CH), 118.6 (CH), 117.7 (CH), 109.3 (C), 108.9 (CH), 44.4 ( $\text{CH}_2$ ), 23.3 ( $\text{CH}_2$ ), 23.2 ( $\text{CH}_2$ ), 22.1 ( $\text{CH}_2$ ), 21.1 ( $\text{CH}_2$ ), 17.5 ( $\text{CH}_3$ ). EI-MS:  $m/z$  225 ( $\text{M}^+$ ), 210, 197, 182, 168, 154, 143, 128, 115, 89, 77, 63, 51. EI-HRMS calcd for  $\text{C}_{16}\text{H}_{19}\text{N}$ : 225.1517. Found: 225.1517.

### 4b: 4a-(But-2-en-1-yl)-2,3,4,4a-tetrahydro-1*H*-carbazole

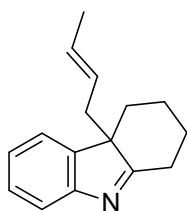

Yellow oil. IR (KBr):  $\nu$  1711, 1616, 1584, 1450  $\text{cm}^{-1}$ .  $^1\text{H-NMR}$  (400 MHz,  $\text{CDCl}_3$ ):  $\delta$  7.57 (d,  $J = 7.6$  Hz, 1H, ArH), 7.26-7.34 (m, 2H, ArH), 7.17 (t,  $J = 7.6$  Hz, 1H, ArH), 5.37 (dq,  $J = 13.6, 6.4$  Hz, 1H, vinyl H), 4.83 (tq,  $J = 13.6, 6.4$  Hz, 1H, vinyl H), 2.84-2.89 (m, 1H, CH), 2.55-2.61 (m, 1H, CH), 2.54 (dt,  $J = 13.6, 5.6$  Hz, 1H, CH), 2.44 (dd,  $J = 13.6, 7.6$  Hz, 1H, CH), 2.34 (dq,  $J = 13.6, 2.8$  Hz, 1H, CH), 2.15-2.24 (m, 1H, CH), 1.81 (tq,  $J = 13.6, 4.0$  Hz, 1H, CH), 1.64-1.69 (m, 1H, CH), 1.48 (dd,  $J = 6.4, 0.8$  Hz, 3H,  $\text{CH}_3$ ), 1.41 (tq,  $J = 13.6, 4.0$  Hz, 1H, CH), 1.12 (dt,  $J = 13.6, 4.0$  Hz, 1H, CH);  $^{13}\text{C-NMR}$  (100 MHz,  $\text{CDCl}_3$ ):  $\delta$  189.2 (C), 154.8 (C), 144.9 (C), 128.6 (CH), 127.4 (CH), 124.5 (CH), 124.4 (CH), 121.9 (CH), 120.0 (CH), 57.8 (C), 36.7 ( $\text{CH}_2$ ), 36.4 ( $\text{CH}_2$ ), 30.1 ( $\text{CH}_2$ ), 28.8 ( $\text{CH}_2$ ), 21.0 ( $\text{CH}_2$ ), 17.7 ( $\text{CH}_3$ ). EI-MS:  $m/z$  225 ( $\text{M}^+$ ), 210, 196, 182, 168, 154, 143, 128, 115, 89, 77, 63. EI-HRMS calcd for  $\text{C}_{16}\text{H}_{19}\text{N}$ : 225.1517. Found: 225.1518.

### 3c: *N*-(Hex-2-en-1-yl)-1,2,3,4-tetrahydrocarbazole

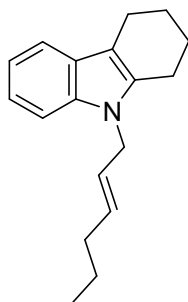

Yellow oil. IR (KBr):  $\nu$  1658, 1613, 1464  $\text{cm}^{-1}$ .  $^1\text{H-NMR}$  (400 MHz,  $\text{CDCl}_3$ ):  $\delta$  7.54 (d,  $J = 7.6$  Hz, 1H, ArH), 7.32 (d,  $J = 8.0$  Hz, 1H, ArH), 7.20 (dt,  $J = 8.0, 1.2$  Hz, 1H, ArH), 7.13 (dt,  $J = 7.6, 1.2$  Hz, 1H, ArH), 5.47-5.61 (m, 2H, vinyl H), 4.63 (dd,  $J = 4.8, 1.2$  Hz, 2H, NCH<sub>2</sub>), 2.81 (t,  $J = 6.0$  Hz, 2H, CH<sub>2</sub>), 2.75 (t,  $J = 6.0$  Hz, 2H, CH<sub>2</sub>), 1.90-2.05 (m, 6H, CH<sub>2</sub> x 3), 1.41 (hext,  $J = 7.6$  Hz, 2H, CH<sub>2</sub>), 0.92 (t,  $J = 7.6$  Hz, 3H, CH<sub>3</sub>);  $^{13}\text{C-NMR}$  (100 MHz,  $\text{CDCl}_3$ ):  $\delta$  136.1 (C), 135.3 (C), 132.6 (CH), 127.3 (C), 125.6 (CH), 120.4 (CH), 118.5 (CH), 117.6 (CH), 109.3 (C), 108.9 (CH), 44.6 (CH<sub>2</sub>), 36.5 (CH<sub>2</sub>), 23.3 (CH<sub>2</sub>), 23.2 (CH<sub>2</sub>), 22.2 (CH<sub>2</sub>), 22.1 (CH<sub>2</sub>), 21.1 (CH<sub>2</sub>), 13.6 (CH<sub>3</sub>). EI-MS:  $m/z$  253 ( $\text{M}^+$ ), 225, 210, 196, 182, 168, 154, 143, 128, 115, 89, 77, 63, 55. EI-HRMS calcd for  $\text{C}_{18}\text{H}_{23}\text{N}$ : 253.1830. Found: 253.1830.

### 4c: 4a-(Hex-2-en-1-yl)-2,3,4,4a-tetrahydro-1*H*-carbazole

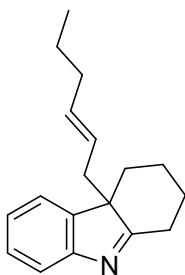

Yellow oil. IR (KBr):  $\nu$  1711, 1616, 1586, 1463  $\text{cm}^{-1}$ .  $^1\text{H-NMR}$  (400 MHz,  $\text{CDCl}_3$ ):  $\delta$  7.57 (d,  $J = 7.6$  Hz, 1H, ArH), 7.31 (dt,  $J = 7.6, 1.2$  Hz, 1H, ArH), 7.28 (dd,  $J = 7.6, 1.2$  Hz, 1H, ArH), 7.17 (dt,  $J = 7.6, 1.2$  Hz, 1H, ArH), 5.33 (dt,  $J = 15.2, 6.8$  Hz, 1H, vinyl H), 4.81 (dt,  $J = 15.2, 6.8$  Hz, 1H, vinyl H), 2.85-2.90 (m, 1H, CH), 2.53-2.59 (m, 2H, CH<sub>2</sub>), 2.49 (dt,  $J = 13.6, 7.6$  Hz, 1H, CH), 2.35 (dq,  $J = 13.6, 2.8$  Hz, 1H, CH), 2.16-2.23 (m, 1H, CH), 1.65-1.88 (m, 4H, CH x 4), 1.43 (tq,  $J = 13.6, 4.4$  Hz, 1H, CH), 1.15-1.23 (m, 2H, CH<sub>2</sub>), 1.14 (dt,  $J = 13.6, 4.4$  Hz, 1H, CH), 0.73 (t,  $J = 7.2$  Hz, 3H, CH<sub>3</sub>);  $^{13}\text{C-NMR}$  (100 MHz,  $\text{CDCl}_3$ ):  $\delta$  189.2 (C), 154.8 (C), 144.9 (C), 134.2 (CH), 127.4 (CH), 124.5 (CH), 123.3 (CH), 121.9 (CH), 120.0 (CH), 57.9 (C), 36.7 (CH<sub>2</sub>), 36.4 (CH<sub>2</sub>), 34.3 (CH<sub>2</sub>), 30.1 (CH<sub>2</sub>), 28.8 (CH<sub>2</sub>), 22.4 (CH<sub>2</sub>), 21.1 (CH<sub>2</sub>), 13.4 (CH<sub>3</sub>). EI-MS:  $m/z$  253 ( $\text{M}^+$ ), 225, 210, 196, 182, 168, 154, 143, 128, 115, 89, 77, 63, 55. EI-HRMS calcd for  $\text{C}_{18}\text{H}_{23}\text{N}$ : 253.1830. Found: 253.1832.

### 3d: *N*-(2-Methylallyl)-tetrahydrocarbazole

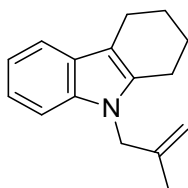

Deep brown oil. IR (KBr):  $\nu$  1656, 1614, 1465  $\text{cm}^{-1}$ .  $^1\text{H-NMR}$  (400 MHz,  $\text{CDCl}_3$ ):  $\delta$  7.50 (d,  $J = 7.2$  Hz, 1H, ArH), 7.24 (d,  $J = 8.4$  Hz, 1H, ArH), 7.15 (ddd,  $J = 8.4, 6.8, 1.2$  Hz, 1H, ArH), 7.09 (ddd,  $J = 7.2, 6.8, 1.2$  Hz, 1H, ArH), 4.84 (dq,  $J = 3.2, 0.8$  Hz, 1H, vinyl H), 4.54 (s, 2H,  $\text{NCH}_2$ ), 4.50 (s, 1H, vinyl H), 2.76 (tt,  $J = 6.0, 1.2$  Hz, 2H,  $\text{CH}_2$ ), 2.68 (tt,  $J = 6.0, 1.2$  Hz, 2H,  $\text{CH}_2$ ) 1.81-1.96 (m, 4H,  $\text{CH}_2 \times 2$ ), 1.72 (s, 3H,  $\text{CH}_3$ );  $^{13}\text{C-NMR}$  (100 MHz,  $\text{CDCl}_3$ ):  $\delta$  141.4 (C), 136.5 (C), 135.6 (C), 127.3 (C), 120.5 (CH), 118.6 (CH), 117.6 (CH), 111.7 (CH), 111.2 (CH), 109.4 (C), 108.9 (CH), 48.5 ( $\text{CH}_2$ ), 23.2 ( $\text{CH}_2$ ), 23.2 ( $\text{CH}_2$ ), 22.0 ( $\text{CH}_2$ ), 21.1 ( $\text{CH}_2$ ), 20.0 ( $\text{CH}_3$ ). EI-MS:  $m/z$  225 ( $\text{M}^+$ ), 210, 197, 182, 168, 142, 115, 89, 77, 44. EI-HRMS calcd for  $\text{C}_{16}\text{H}_{19}\text{N}$ : 225.1517. Found: 225.1517.

### 3e: 9-(3-methylbut-2-en-1-yl)-2,3,4,9-tetrahydro-1H-carbazole

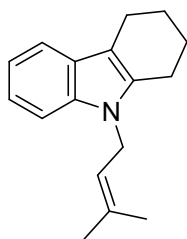

Deep brown oil. IR (KBr):  $\nu$  1678, 1654, 1612, 1463  $\text{cm}^{-1}$ .  $^1\text{H-NMR}$  (400 MHz,  $\text{CDCl}_3$ ):  $\delta$  7.47 (d,  $J = 7.6$  Hz, 1H, ArH), 7.24 (d,  $J = 8.0$  Hz, 1H, ArH), 7.13 (dt,  $J = 8.0, 1.2$  Hz, 1H, ArH), 7.06 (ddd,  $J = 8.0, 7.6, 1.2$  Hz, 1H, ArH), 5.17-5.21 (m, 1H, vinyl H), 4.62 (d,  $J = 6.8$  Hz, 2H,  $\text{NCH}_2$ ), 2.73 (tt,  $J = 6.4, 1.6$  Hz, 2H  $\text{CH}_2$ ), 2.70 (tt,  $J = 6.4, 1.6$  Hz, 2H  $\text{CH}_2$ ), 1.85-1.97 (m, 4H,  $\text{CH}_2 \times 2$ ), 1.84 (s, 3H,  $\text{CH}_3$ ), 1.70 (s, 3H,  $\text{CH}_3$ );  $^{13}\text{C-NMR}$  (100 MHz,  $\text{CDCl}_3$ ):  $\delta$  135.2 (C), 133.9 (C), 127.3 (C), 125.5 (C), 121.1 (CH), 120.3 (CH), 118.5 (CH), 117.7 (CH), 109.3 (C), 108.8 (CH), 40.9 ( $\text{CH}_2$ ), 25.5 ( $\text{CH}_2$ ), 23.3 ( $\text{CH}_2$ ), 23.2 ( $\text{CH}_2$ ), 22.2 ( $\text{CH}_2$ ), 21.1 ( $\text{CH}_3$ ), 18.0 ( $\text{CH}_3$ ). EI-MS:  $m/z$  239 ( $\text{M}^+$ ), 211, 196, 183, 171, 168, 115, 89, 77. EI-HRMS calcd for  $\text{C}_{17}\text{H}_{21}\text{N}$ : 239.1674. Found: 239.1677.

### 3f: *N*-Allyl-3-methylindole

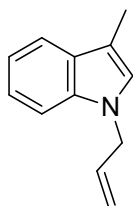

Yellow oil. IR (KBr):  $\nu$  1614, 1459  $\text{cm}^{-1}$ .  $^1\text{H-NMR}$  (400 MHz,  $\text{CDCl}_3$ ):  $\delta$  7.57 (ddd,  $J = 8.4, 1.2, 0.8$  Hz, 1H, ArH), 7.27 (ddd,  $J = 8.0, 1.2, 0.8$  Hz, 1H, ArH), 7.18 (ddd,  $J = 8.4, 6.8, 1.2$  Hz, 1H, ArH), 7.10 (ddd,  $J = 8.0, 6.8, 0.8$  Hz, 1H, ArH), 6.86 (s,  $J = 1$  Hz, ArH), 5.96 (ddt,  $J = 17.2, 10.0, 5.2$  Hz, 1H, vinyl H), 5.16 (ddt,  $J = 10.0, 1.6, 1.2$  Hz, 1H, vinyl H), 5.07 (ddt,  $J = 17.2, 1.6, 1.2$  Hz, 1H, vinyl H), 4.65 (dt,  $J = 5.2, 1.6$  Hz, 2H,  $\text{NCH}_2$ ), 2.32 (s, 3H,  $\text{CH}_3$ );  $^{13}\text{C-NMR}$  (100 MHz,  $\text{CDCl}_3$ ):  $\delta$  136.4 (C), 133.8 (CH), 128.9 (C), 125.4 (CH), 121.4 (CH), 119.0 (CH), 118.6 (CH), 117.0 ( $\text{CH}_2$ ), 110.5 (C), 109.3 (CH), 48.5 ( $\text{CH}_2$ ), 9.6 ( $\text{CH}_3$ ). EI-MS:  $m/z$  171 ( $\text{M}^+$ ), 156, 144, 130, 129, 103, 89, 77, 51. EI-HRMS calcd for  $\text{C}_{12}\text{H}_{13}\text{N}$ : 171.1048. Found: 171.1051.

### 3g: *N*-Allyl-2,3-dimethylindole

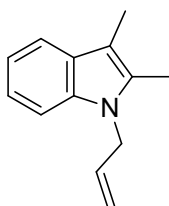

Yellow oil. IR (KBr):  $\nu$  1696, 1614, 1452  $\text{cm}^{-1}$ .  $^1\text{H-NMR}$  (400 MHz,  $\text{CDCl}_3$ ):  $\delta$  7.49 (dd,  $J = 7.6, 1.2$  Hz, 1H, ArH), 7.20 (dd,  $J = 7.6, 1.2$  Hz, 1H, ArH), 7.12 (ddd,  $J = 7.6, 7.2, 1.2$  Hz, 1H, ArH), 7.07 (ddd,  $J = 7.6, 7.2, 1.2$  Hz, 1H, ArH), 5.92 (ddt,  $J = 17.2, 10.4, 4.4$  Hz, 1H, vinyl H), 5.09 (ddt,  $J = 10.4, 2.0, 1.2$  Hz, 1H, vinyl H), 4.82 (ddt,  $J = 17.2, 2.0, 1.2$  Hz, 1H, vinyl H), 4.66 (dt,  $J = 4.4, 2.0$  Hz, 2H,  $\text{CH}_2$ ), 2.31 (s, 3H,  $\text{CH}_3$ ), 2.26 (s, 3H,  $\text{CH}_3$ );  $^{13}\text{C-NMR}$  (100 MHz,  $\text{CDCl}_3$ ):  $\delta$  136.0 (C), 133.7 (CH), 132.2 (C), 128.5 (C), 120.5 (CH), 118.7 (CH), 117.9 (CH), 115.9 ( $\text{CH}_2$ ), 108.6 (CH), 106.7 (C), 45.3 ( $\text{CH}_2$ ), 9.9 ( $\text{CH}_3$ ), 8.8 ( $\text{CH}_3$ ). EI-MS:  $m/z$  185 ( $\text{M}^+$ ), 170, 158, 144, 128, 115, 102, 88, 77, 51. EI-HRMS calcd for  $\text{C}_{13}\text{H}_{15}\text{N}$ : 185.1204. Found: 185.1202.

### 3h: 3-Allyl-1,2-dimethyl-3*H*-benzo[*e*]indole

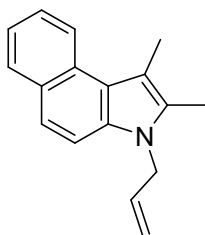

Yellow oil. IR (KBr):  $\nu$  1647, 1592, 1441  $\text{cm}^{-1}$ .  $^1\text{H-NMR}$  (400 MHz,  $\text{CDCl}_3$ ):  $\delta$  8.59 (d,  $J = 8.4$  Hz, 1H, ArH), 7.96 (d,  $J = 8.0$  Hz, 1H, ArH), 7.58 (d,  $J = 8.8$  Hz, 1H, ArH), 7.58 (ddd,  $J = 8.4, 6.8, 1.2$  Hz, 1H, ArH), 7.45 (d,  $J = 8.8$  Hz, 1H, ArH), 7.43 (ddd,  $J = 8.0, 6.8, 1.2$  Hz, 1H, ArH), 5.99 (ddt,  $J = 17.2, 10.4, 4.4$  Hz, 1H, vinyl H), 5.14 (ddt,  $J = 10.4, 1.6, 1.2$  Hz, 1H, vinyl H), 4.80 (dt,  $J = 4.4, 1.6$  Hz, 2H,  $\text{NCH}_2$ ), 4.76 (ddt,  $J = 17.2, 1.6, 1.2$  Hz, 2H, vinyl H), 2.73 (s, 3H,  $\text{CH}_3$ ), 2.43 (s, 3H,  $\text{CH}_3$ );  $^{13}\text{C-NMR}$  (100 MHz,  $\text{CDCl}_3$ ):  $\delta$  133.6 (CH), 132.3 (C), 130.6 (C), 129.2 (C), 128.6 (CH), 125.1 (CH), 123.2 (CH), 122.3 (CH), 121.4 (CH), 121.0 (C), 116.0 ( $\text{CH}_2$ ), 110.8 (CH), 109.3 (C), 45.4 ( $\text{CH}_2$ ), 12.8 ( $\text{CH}_3$ ), 9.7 ( $\text{CH}_3$ ). EI-MS:  $m/z$  235 ( $\text{M}^+$ ), 220, 194, 178, 152, 127, 108, 75. EI-HRMS calcd for  $\text{C}_{17}\text{H}_{17}\text{N}$ : 235.1361. Found: 235.1359

### 3i: 4-Allyl-1,2,3,4-tetrahydrocyclopenta[*b*]indole

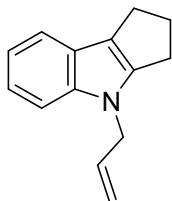

Yellow oil. IR (KBr):  $\nu$  1650, 1610, 1457  $\text{cm}^{-1}$ .  $^1\text{H-NMR}$  (400 MHz,  $\text{CDCl}_3$ ):  $\delta$  7.47 (dd,  $J = 7.2, 0.8$  Hz, 1H, ArH), 7.26 (dd,  $J = 7.2, 1.6$  Hz, 1H, ArH), 7.13 (dt,  $J = 7.2, 1.6$  Hz, 1H, ArH), 7.08 (dt,  $J = 7.2, 0.8$  Hz, 1H, ArH), 5.97 (ddt,  $J = 16.0, 10.4, 5.2$  Hz, 1H, vinyl H), 5.16 (ddt,  $J = 10.4, 1.6, 1.6$  Hz, 1H, vinyl H), 5.03 (ddt,  $J = 16.0, 1.6, 1.6$  Hz, 1H, vinyl H), 4.66 (dt,  $J = 5.2, 1.6$  Hz, 2H,  $\text{NCH}_2$ ), 2.89 (t,  $J = 7.2$  Hz, 2H,  $\text{CH}_2$ ), 2.85 (t,  $J = 6.0$  Hz, 2H,  $\text{CH}_2$ ), 2.56 (quin,  $J = 6.8$  Hz, 2H,  $\text{CH}_2$ );  $^{13}\text{C-NMR}$  (100 MHz,  $\text{CDCl}_3$ ):  $\delta$  146.1 (C), 140.8 (C), 133.7 (CH), 124.5 (C), 119.9 (CH), 119.0 (CH), 118.5 (CH), 118.0 (C), 116.4 ( $\text{CH}_2$ ), 109.7 (CH), 47.1 ( $\text{CH}_2$ ), 28.4 ( $\text{CH}_2$ ), 25.0 ( $\text{CH}_2$ ), 24.6 ( $\text{CH}_2$ ). EI-MS:  $m/z$  197 ( $\text{M}^+$ ), 182, 168, 154, 143, 128, 115, 77. EI-HRMS calcd for  $\text{C}_{14}\text{H}_{15}\text{N}$ : 197.1204. Found: 197.1202.

### 3j: *N*-Allyl-6,7,8,9,10,10a-hexahydro-cyclohepta[*b*]indole

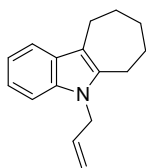

Yellow oil. IR (KBr):  $\nu$  1643, 1611, 1465  $\text{cm}^{-1}$ .  $^1\text{H-NMR}$  (400 MHz,  $\text{CDCl}_3$ ):  $\delta$  7.56 (dd,  $J = 7.6$  Hz, 1.2, 1H, ArH), 7.25 (dd,  $J = 7.2, 1.2$  Hz, 1H, ArH), 7.17 (dt,  $J = 7.2, 1.2$  Hz, 1H, ArH), 7.13 (dt,  $J = 7.2, 1.2$  Hz, 1H, ArH), 5.97 (ddt,  $J = 17.2, 10.4, 4.4$  Hz, 1H, vinyl H), 5.14 (ddt,  $J = 10.4, 2.0, 1.2$  Hz, 1H, vinyl H), 4.88 (ddt,  $J = 17.2, 2.0, 1.2$  Hz, 1H, vinyl H), 4.73 (dt,  $J = 4.4, 2.0$  Hz, 2H,  $\text{NCH}_2$ ), 2.84-2.93 (m, 4H,  $\text{CH}_2 \times 2$ ), 1.80-1.98 (m, 6H,  $\text{CH}_2 \times 3$ );  $^{13}\text{C-NMR}$  (100 MHz,  $\text{CDCl}_3$ ):  $\delta$  138.8 (C), 135.3 (C), 134.0 (CH), 127.9 (C), 120.3 (CH), 118.7 (CH), 117.6 (CH), 115.8 ( $\text{CH}_2$ ), 113.9 (C), 108.8 (CH), 45.0 ( $\text{CH}_2$ ), 31.7 ( $\text{CH}_2$ ), 28.4 ( $\text{CH}_2$ ), 27.2 ( $\text{CH}_2$ ), 26.3 ( $\text{CH}_2$ ), 24.4 ( $\text{CH}_2$ ). EI-MS:  $m/z$  225 ( $\text{M}^+$ ), 209, 196, 182, 168, 156, 142, 128, 115, 89, 77, 63, 51. EI-HRMS calcd for  $\text{C}_{16}\text{H}_{19}\text{N}$ : 225.1517. Found: 225.1517.



$^1\text{H}$  and  $^{13}\text{C}$  NMR spectra of **3a**

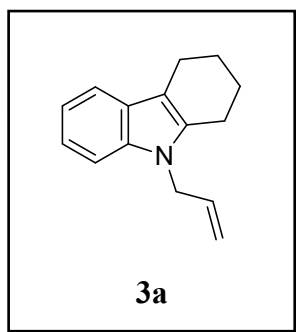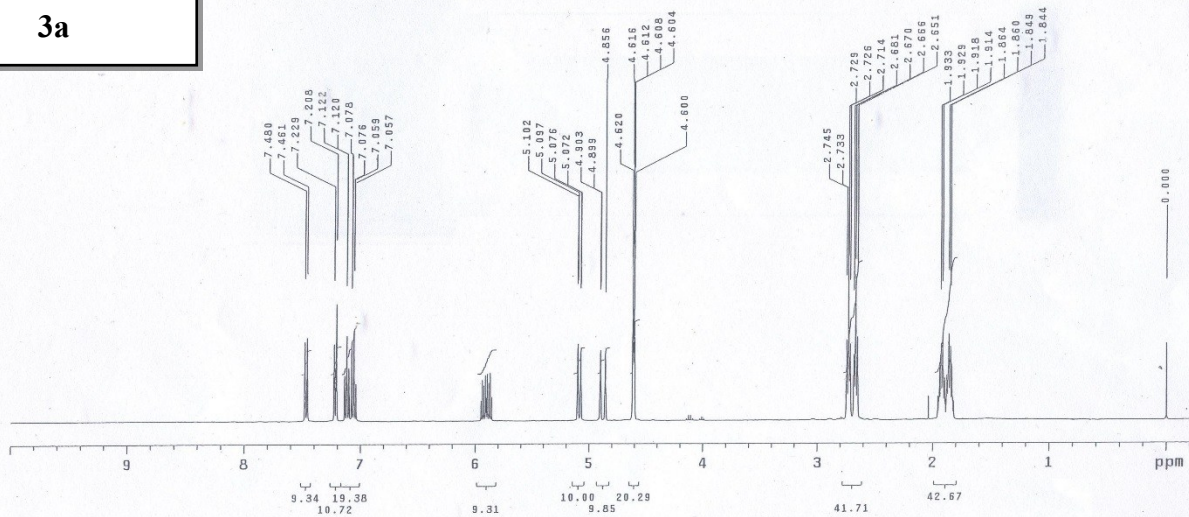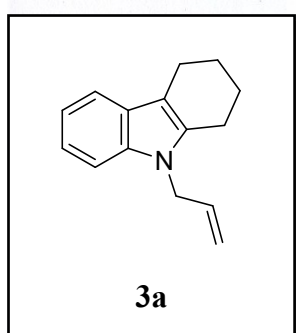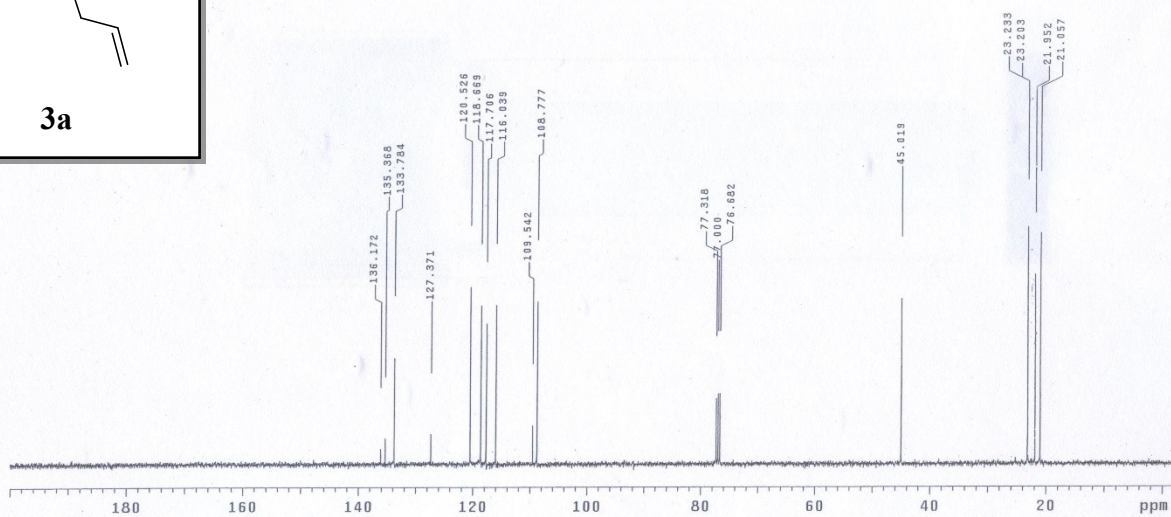

$^1\text{H}$  and  $^{13}\text{C}$  NMR spectra of **4a**

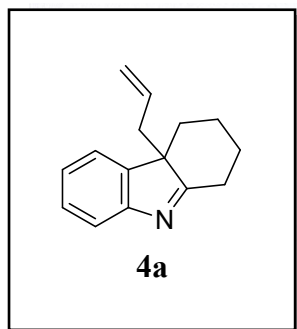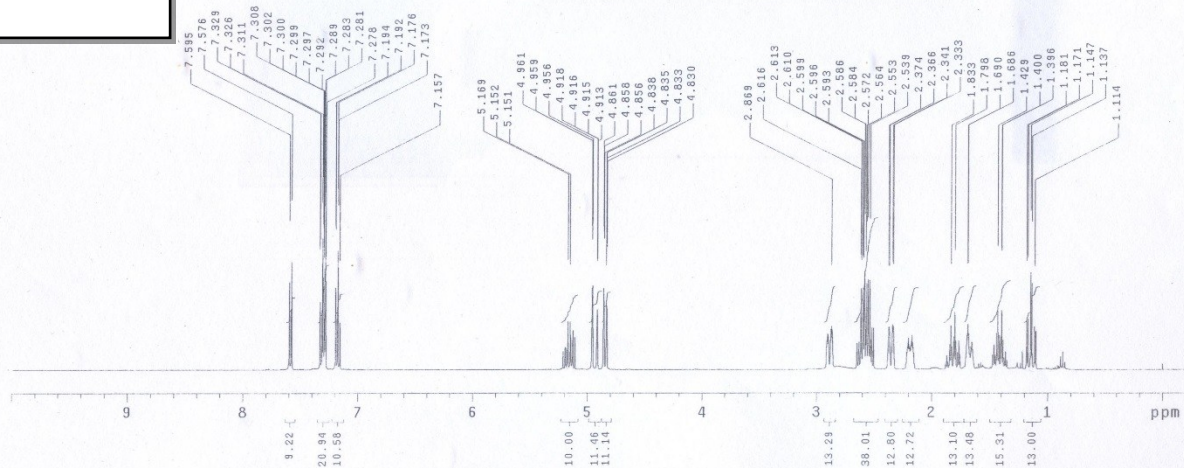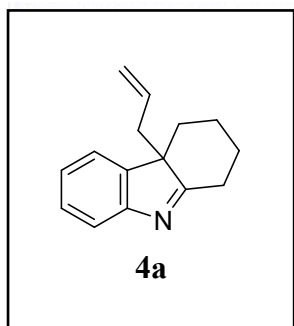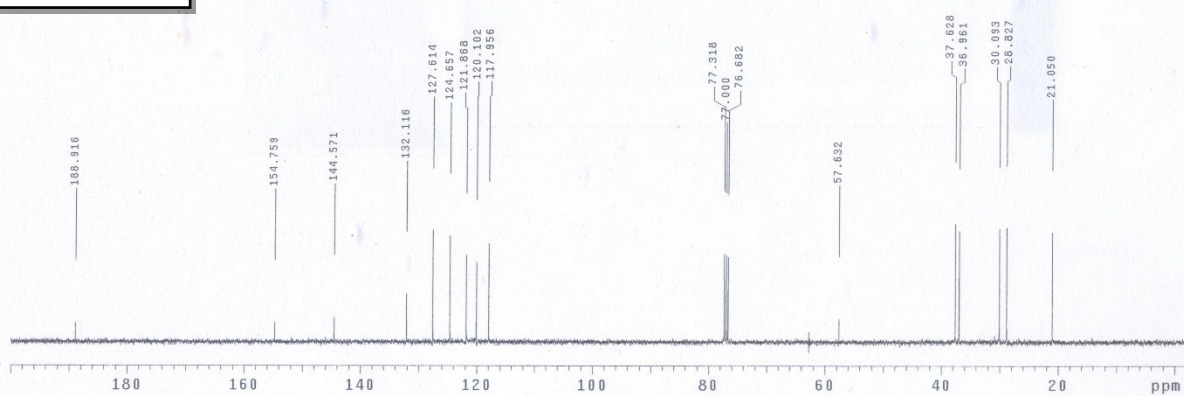

$^1\text{H}$  and  $^{13}\text{C}$  NMR spectra of **3b**

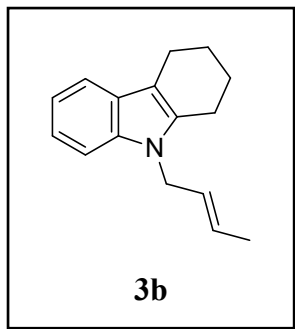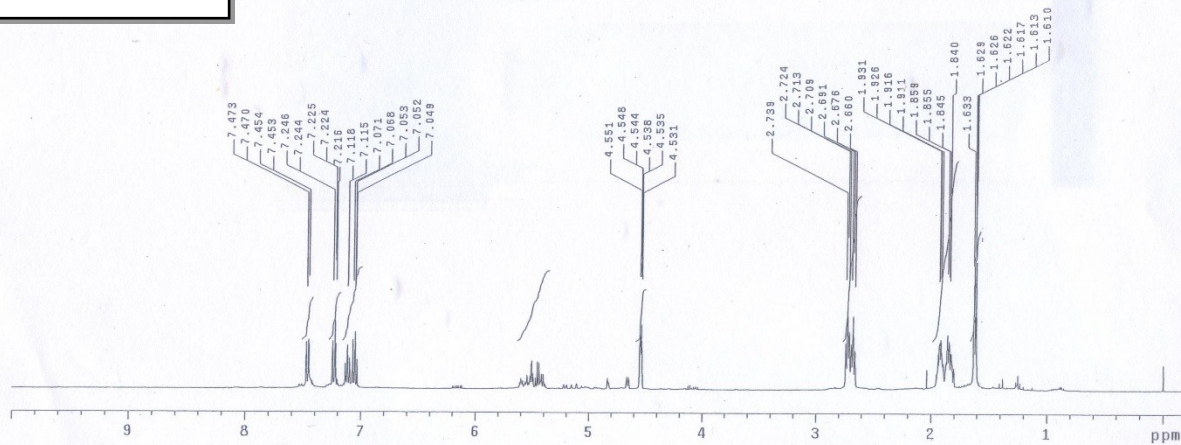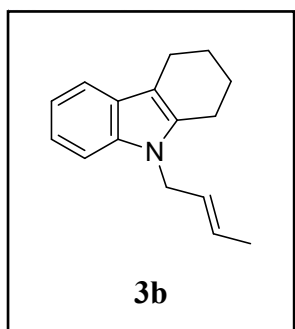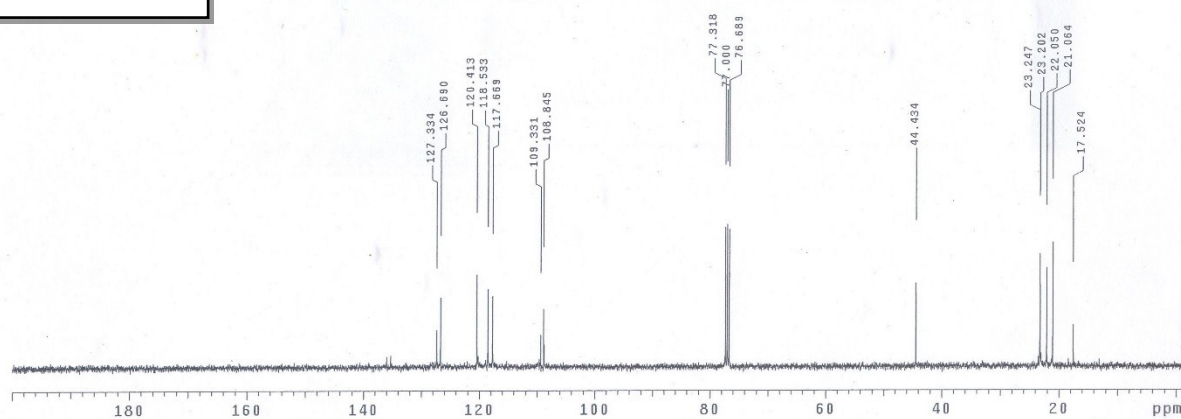

$^1\text{H}$  and  $^{13}\text{C}$  NMR spectra of **4b**

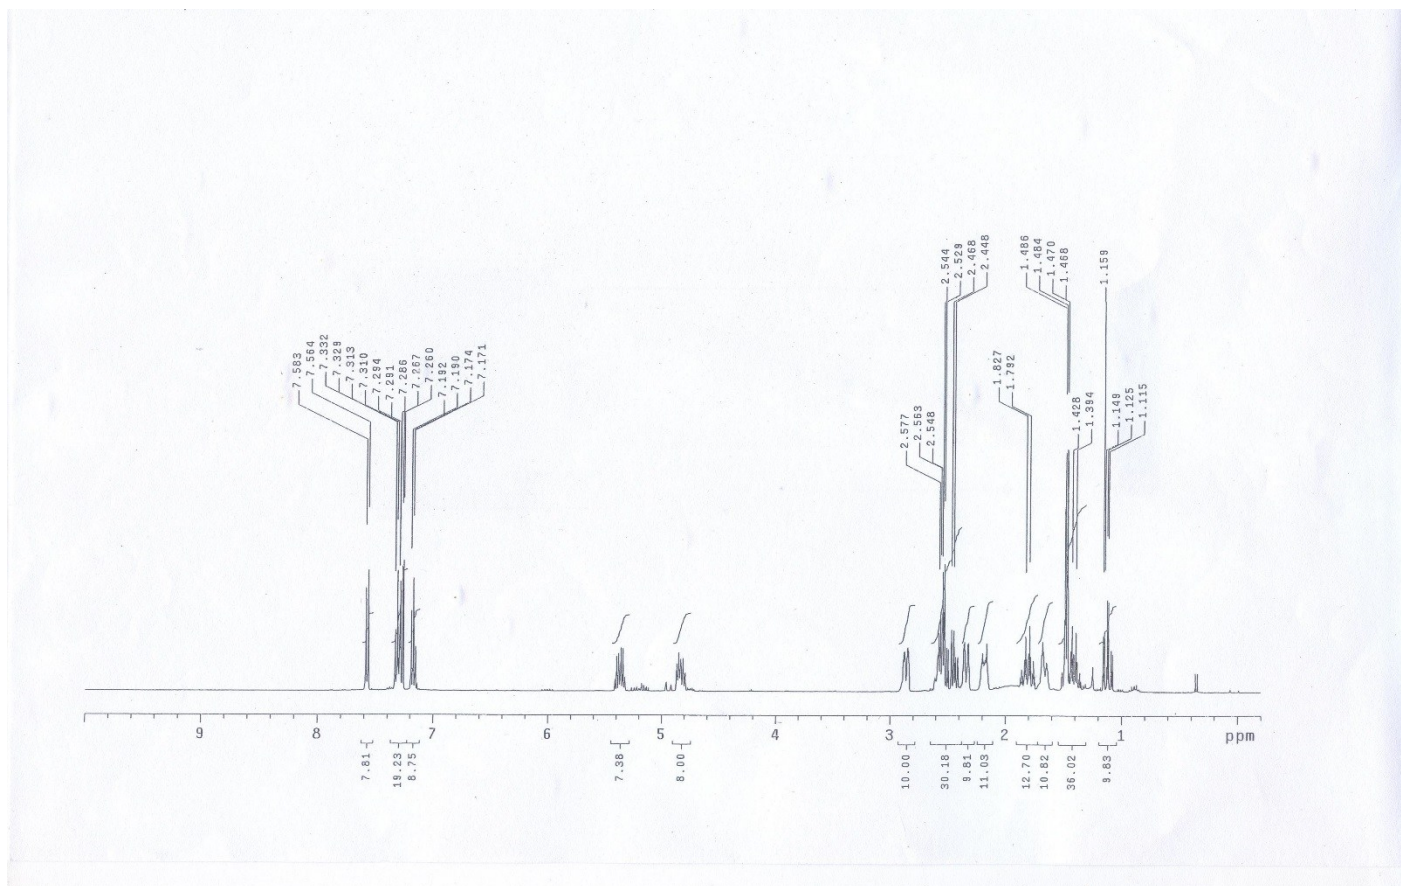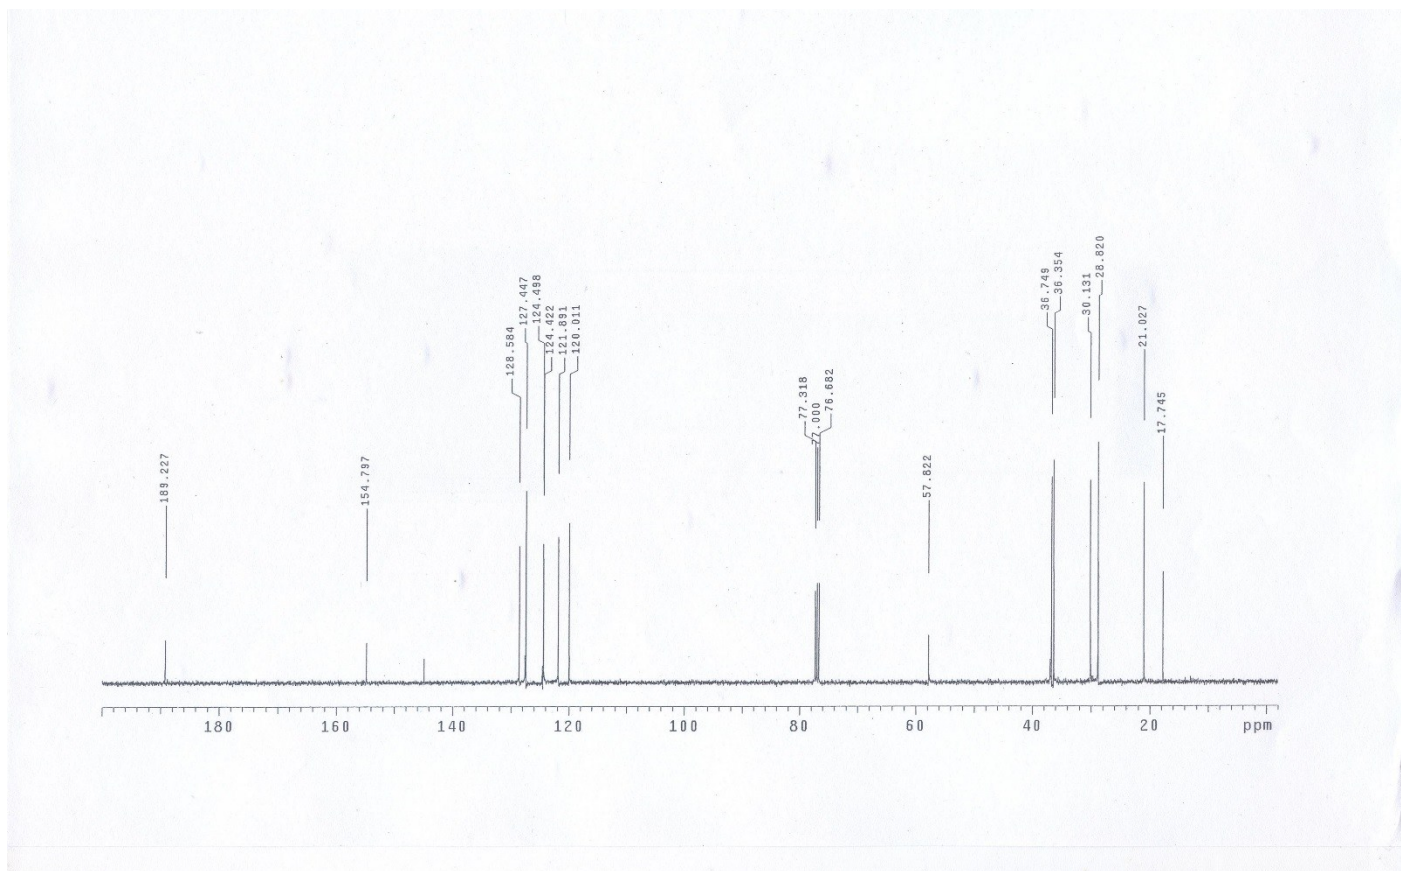

$^1\text{H}$  and  $^{13}\text{C}$  NMR spectra of **3c**

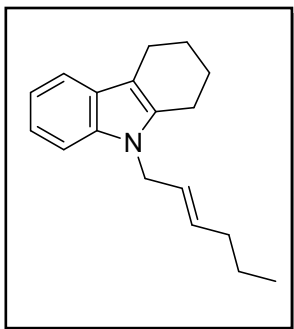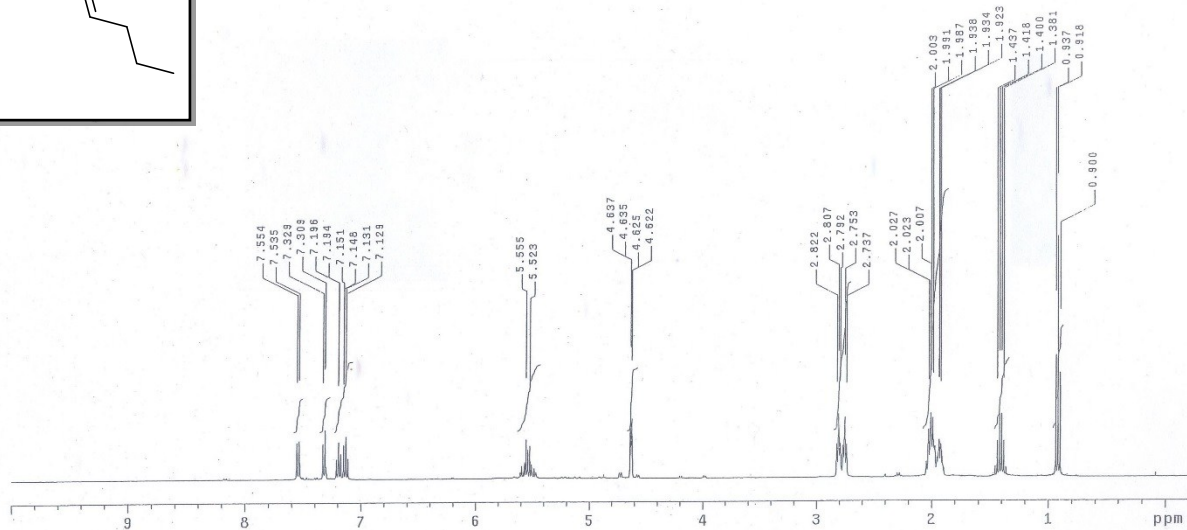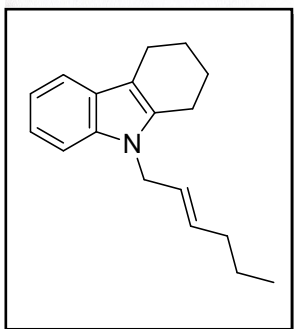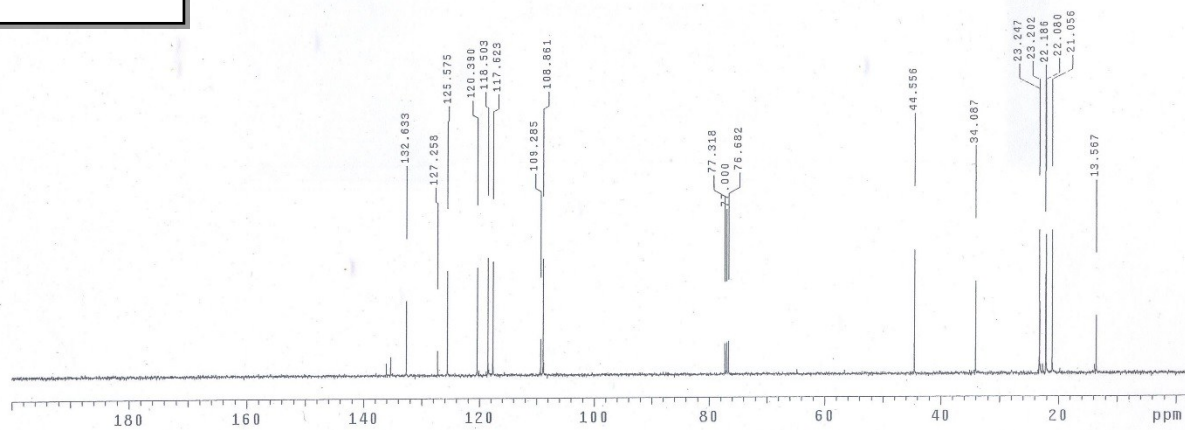

$^1\text{H}$  and  $^{13}\text{C}$  NMR spectra of **4c**

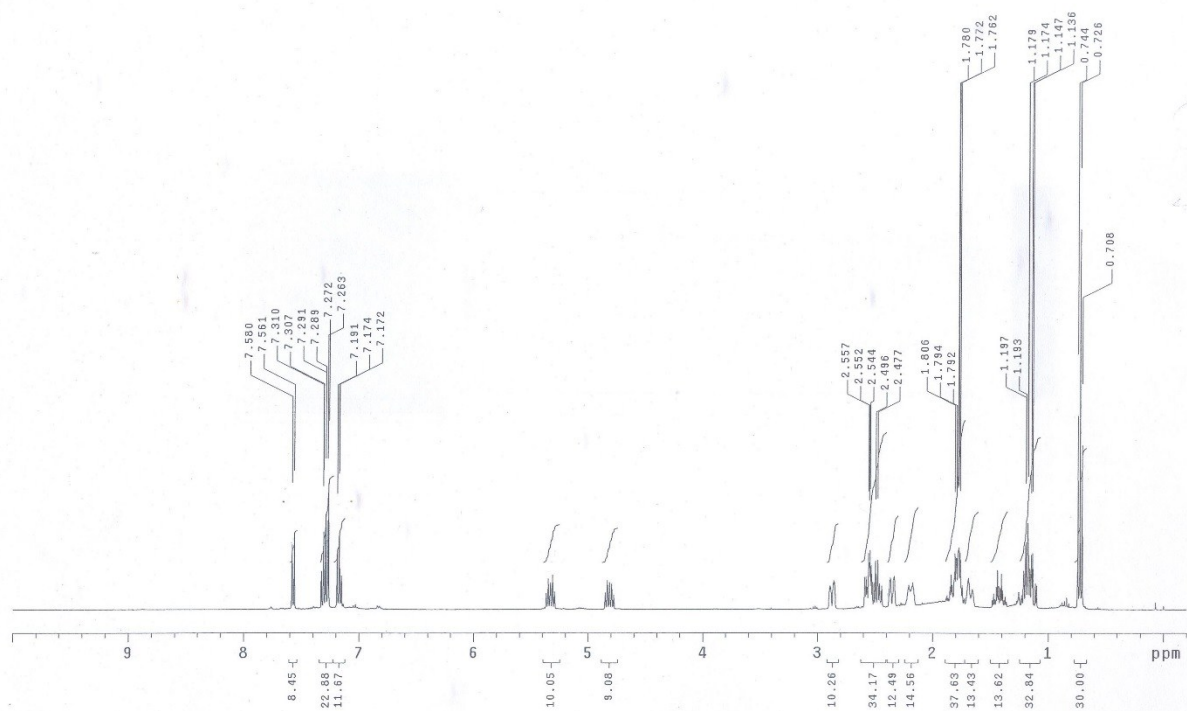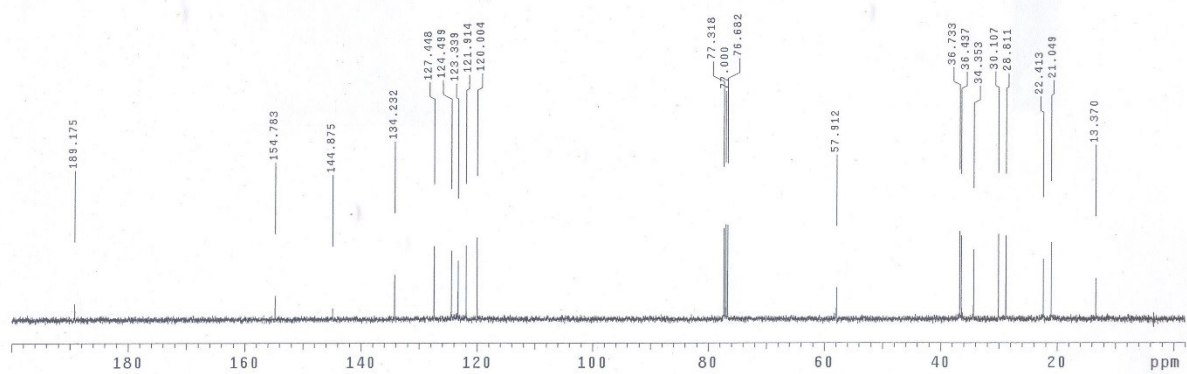

$^1\text{H}$  and  $^{13}\text{C}$  NMR spectra of **3d**

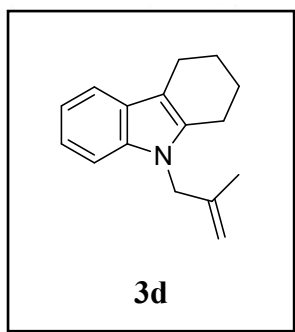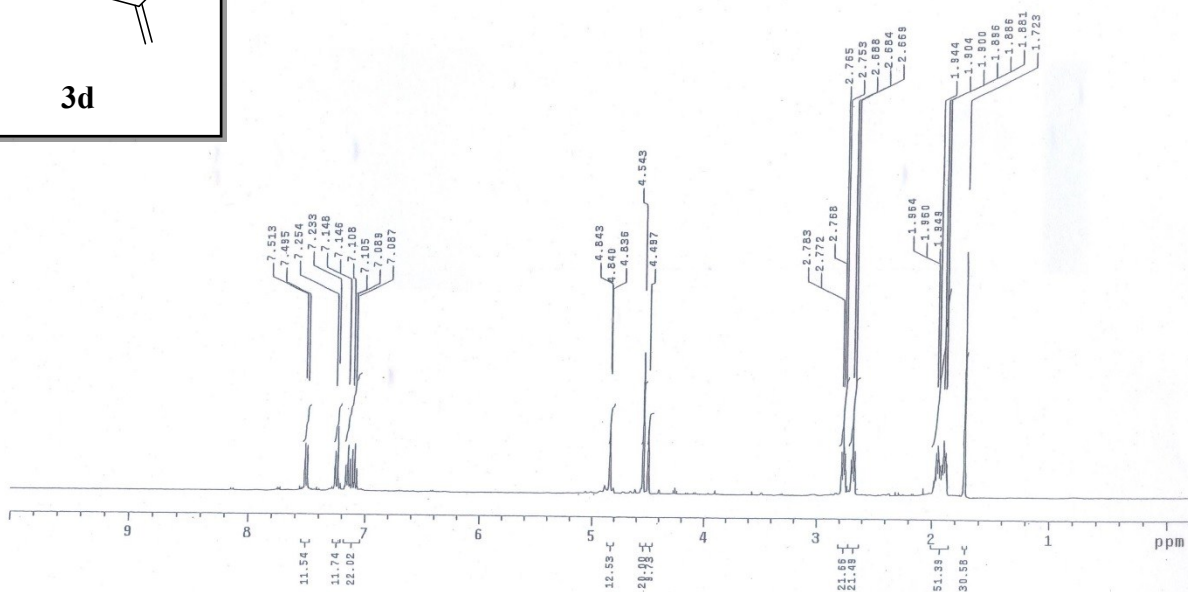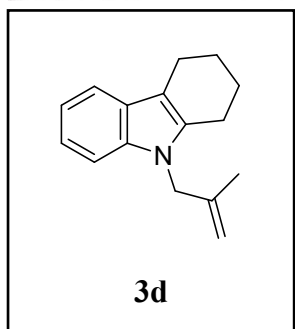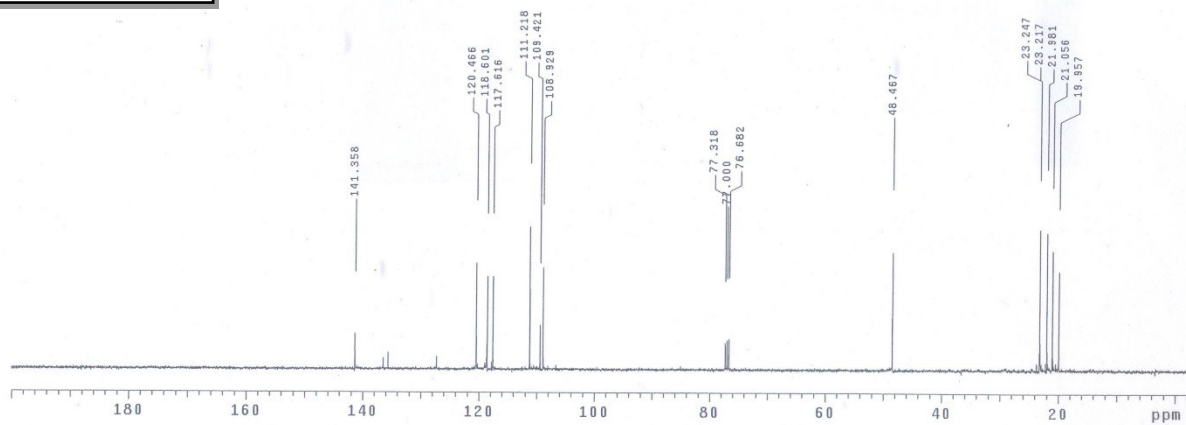

$^1\text{H}$  and  $^{13}\text{C}$  NMR spectra of **3e**

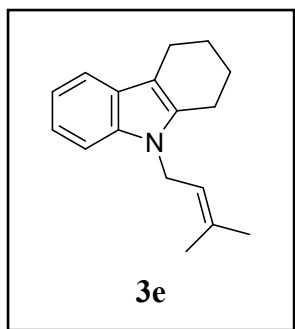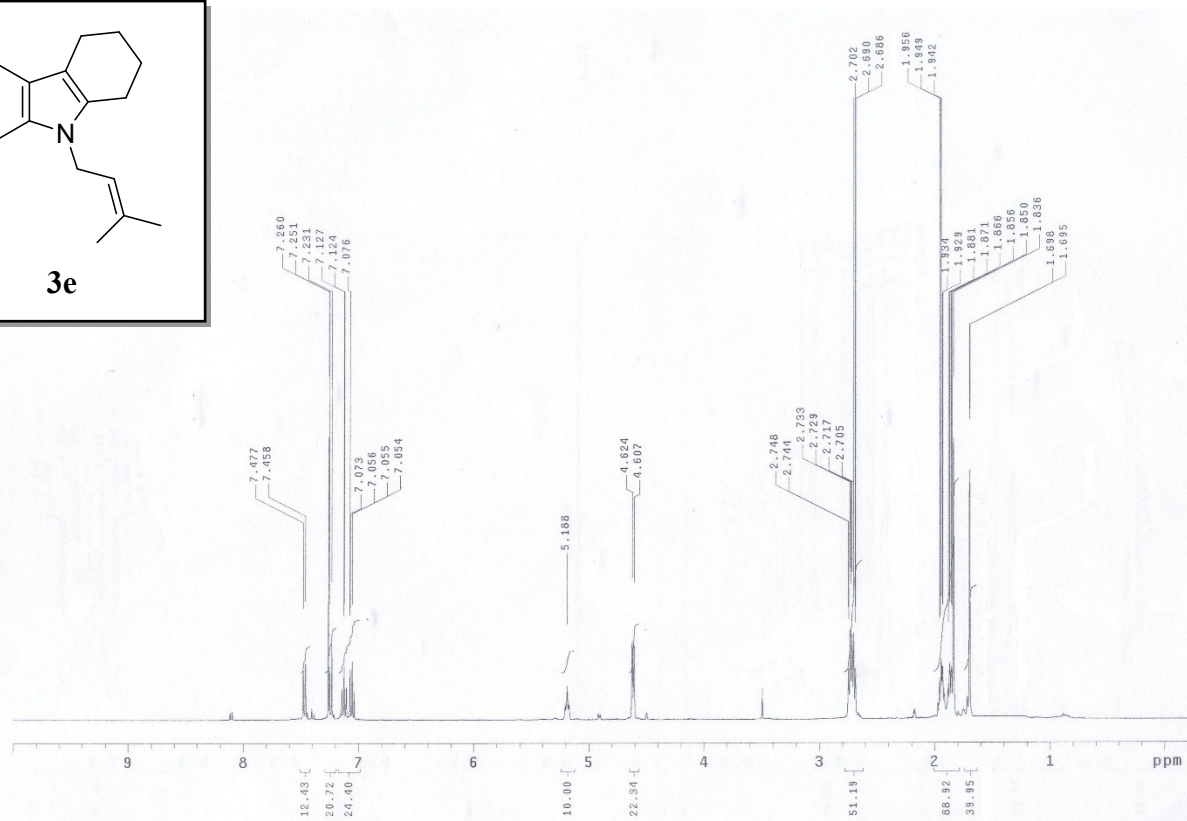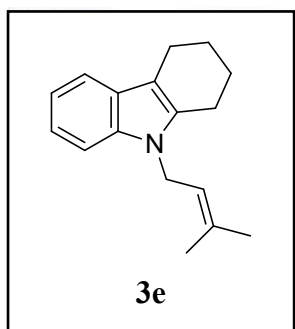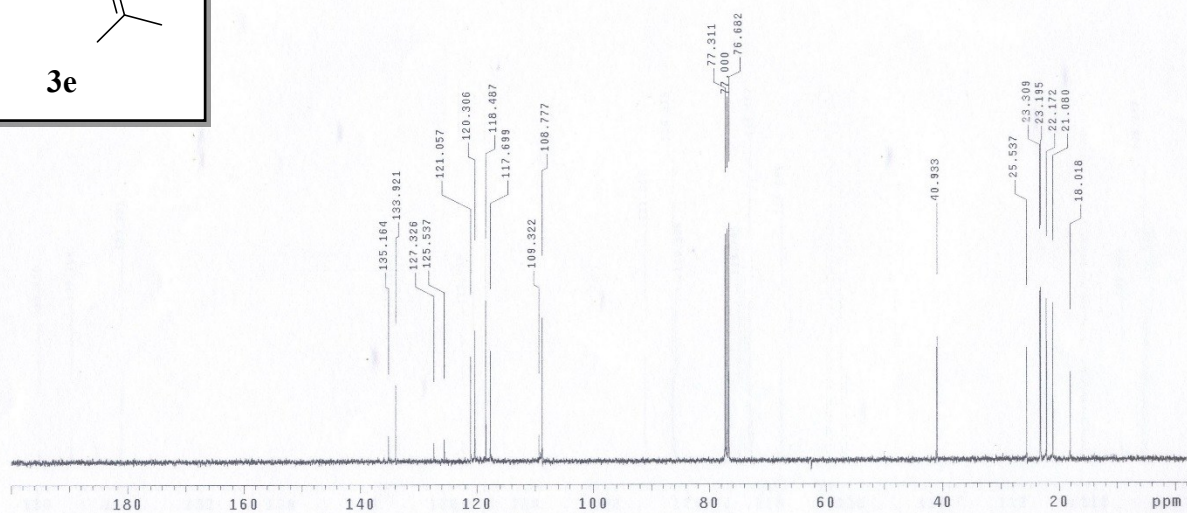



$^1\text{H}$  and  $^{13}\text{C}$  NMR spectra of **3f**

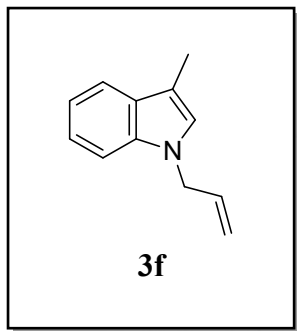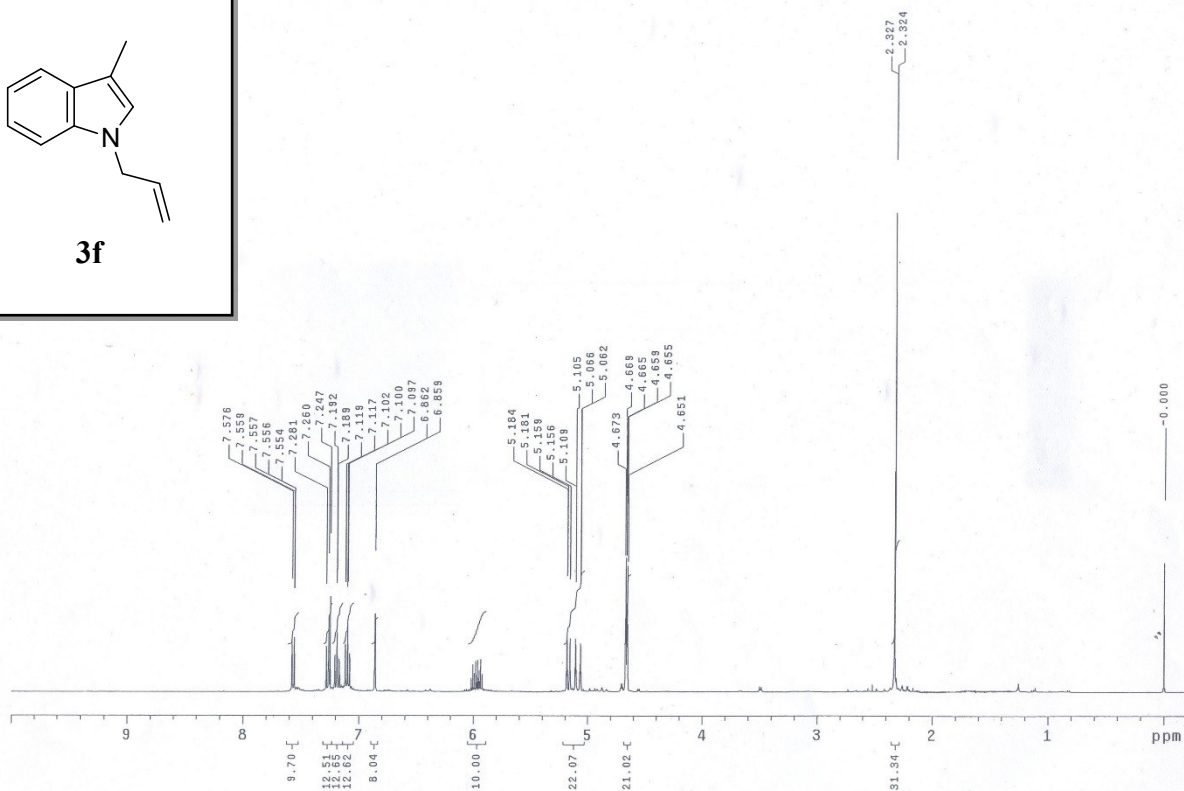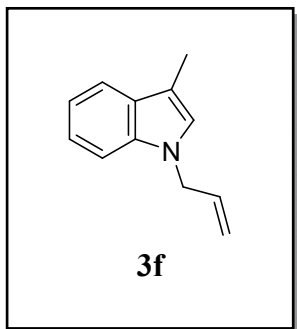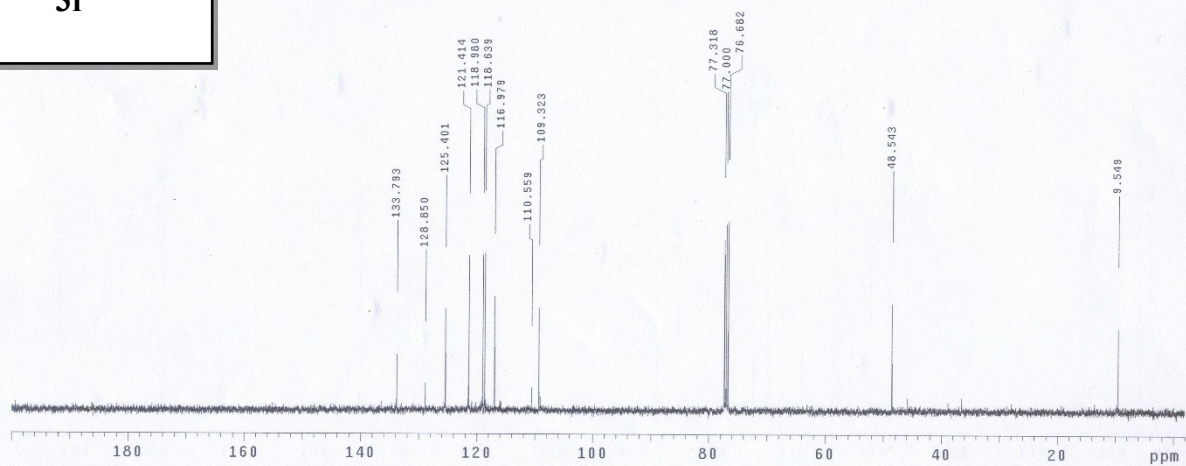

$^1\text{H}$  and  $^{13}\text{C}$  NMR spectra of **3g**

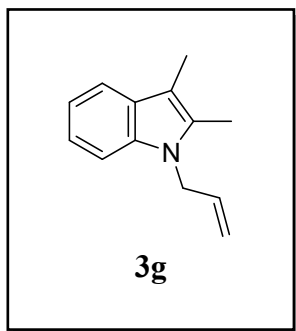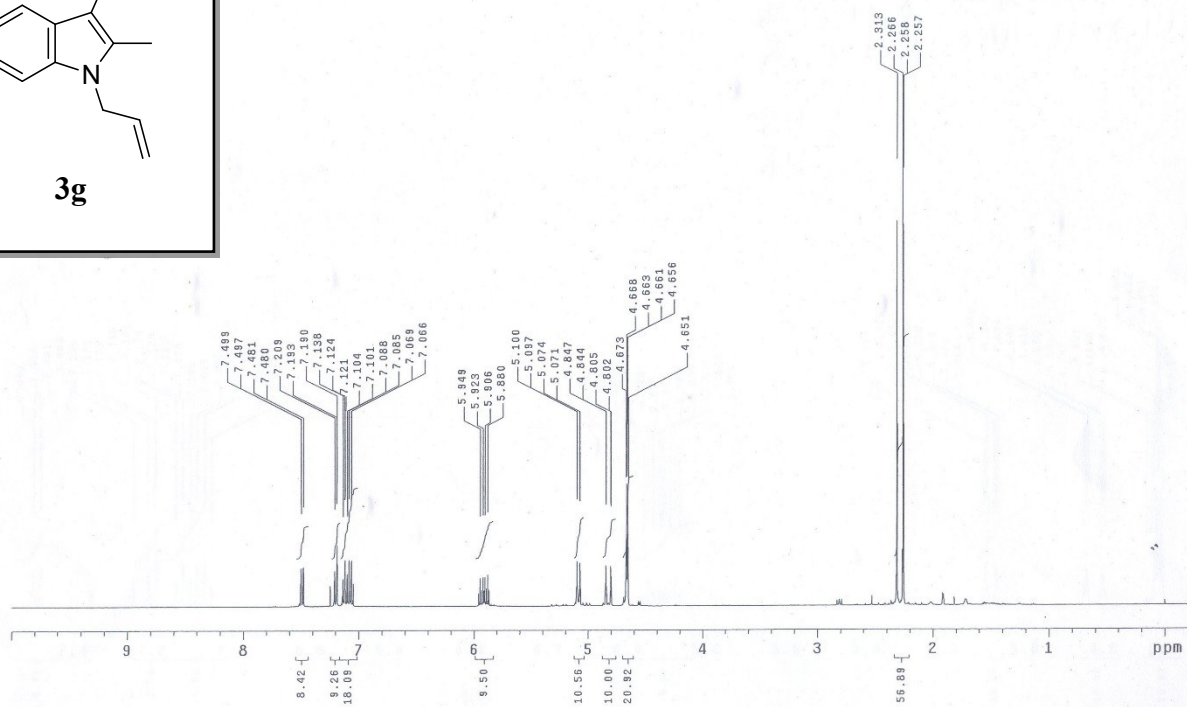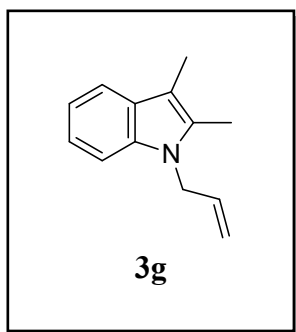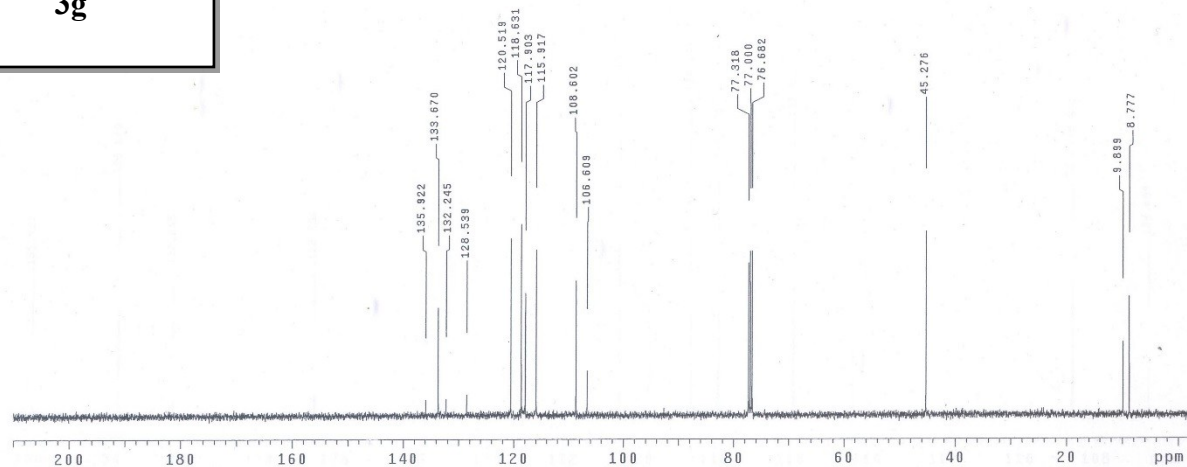

$^1\text{H}$  and  $^{13}\text{C}$  NMR spectra of **3h**

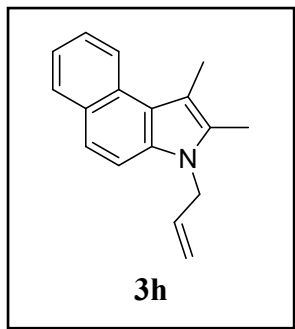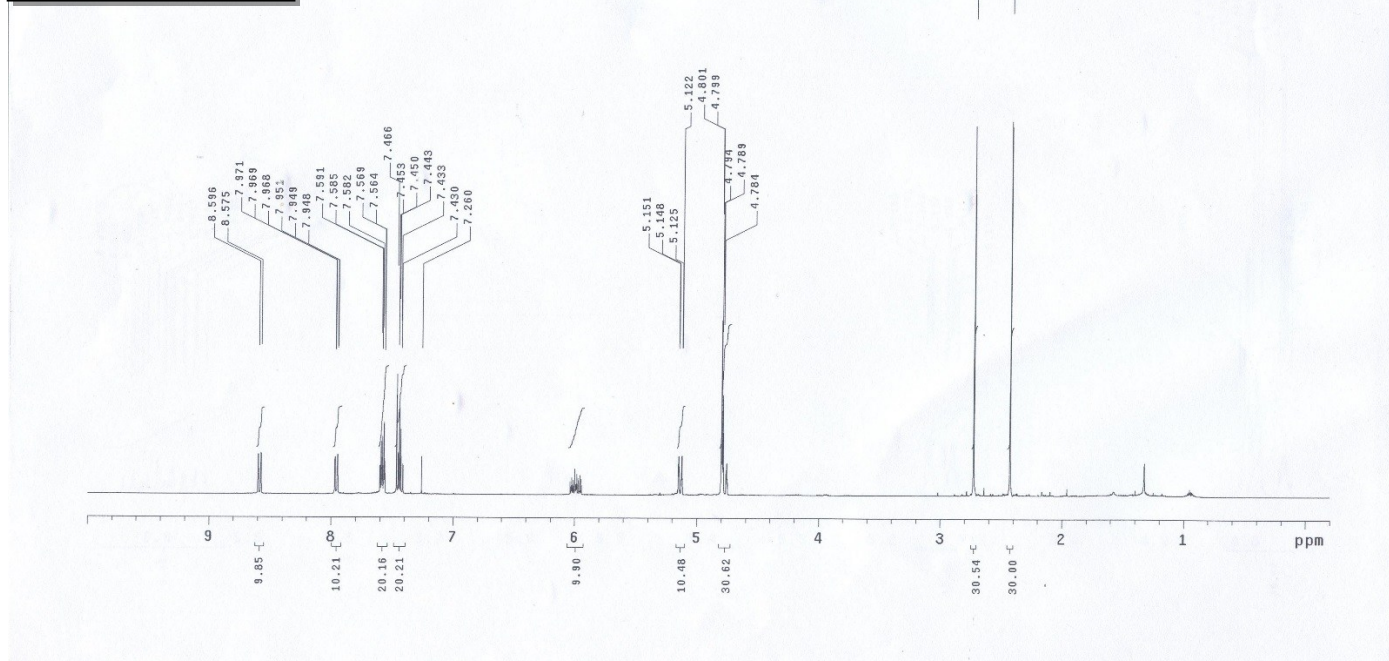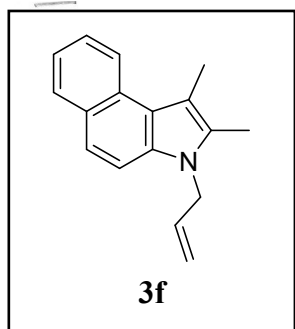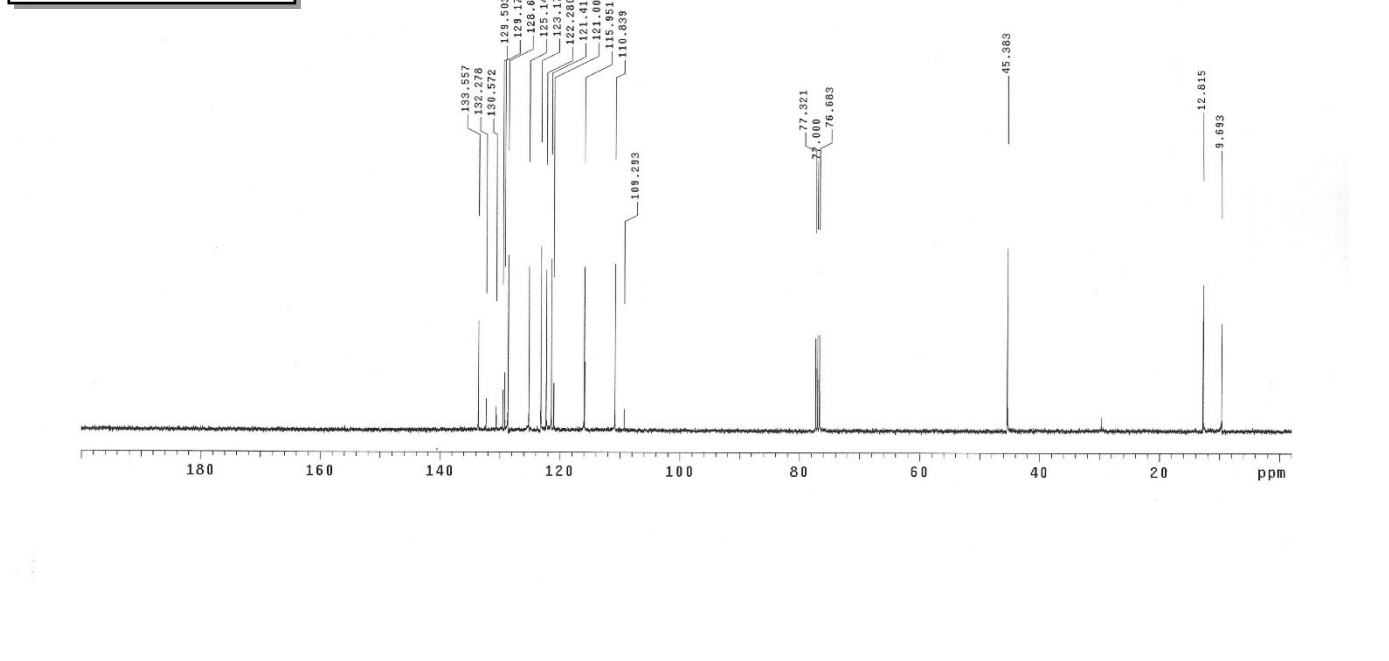

$^1\text{H}$  and  $^{13}\text{C}$  NMR spectra of **3i**

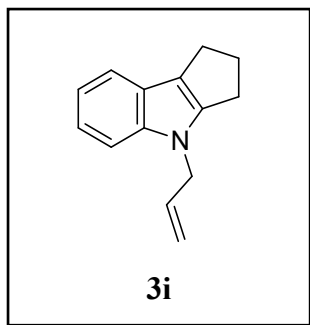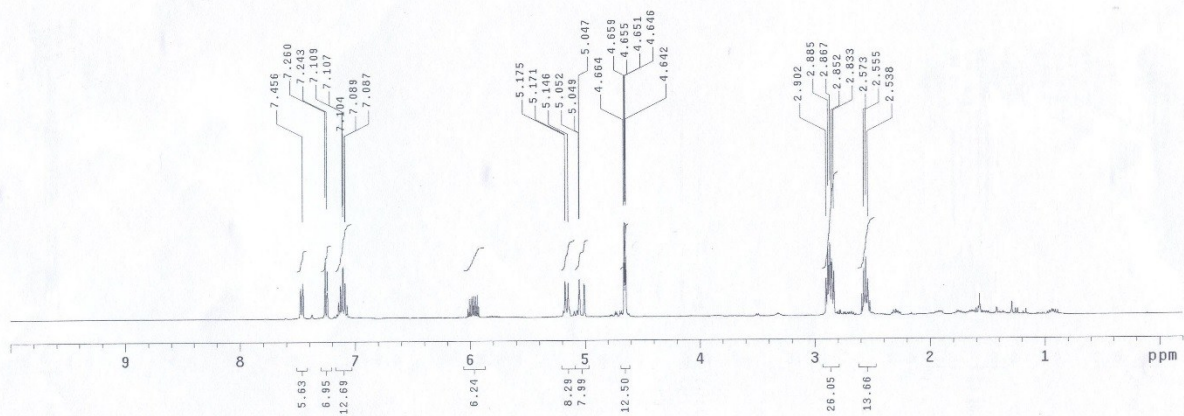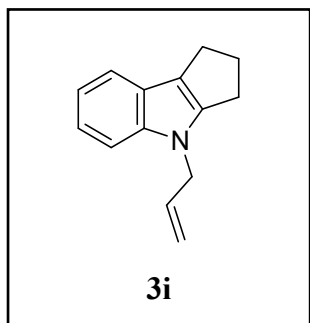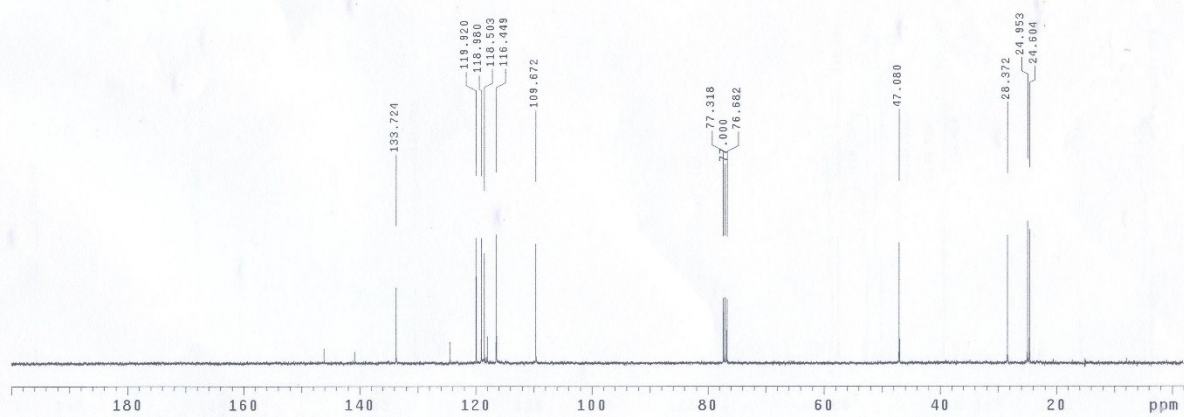

$^1\text{H}$  and  $^{13}\text{C}$  NMR spectra of **3j**

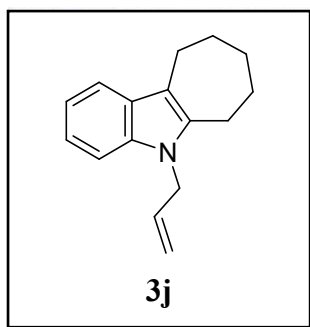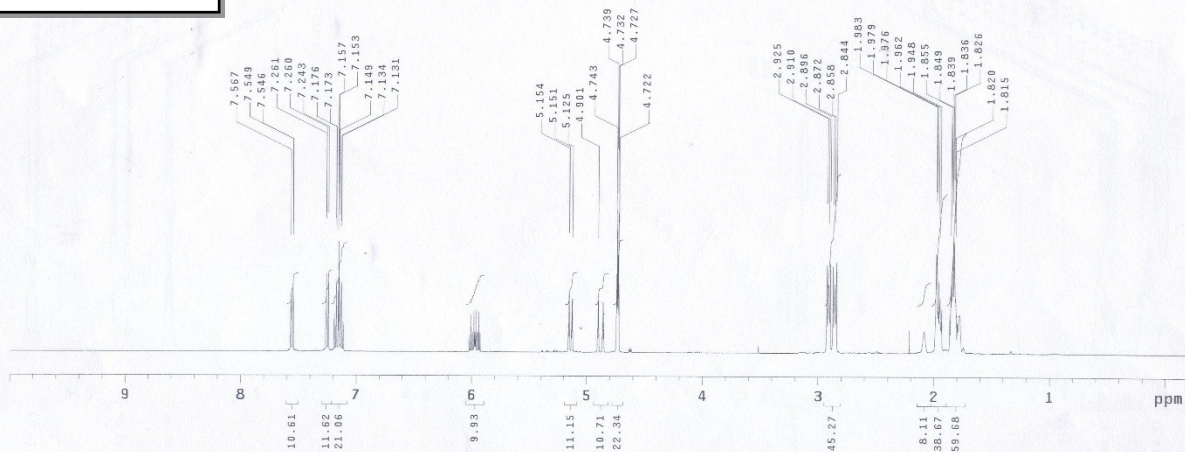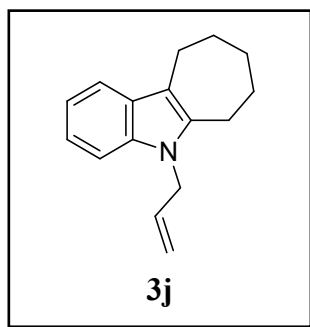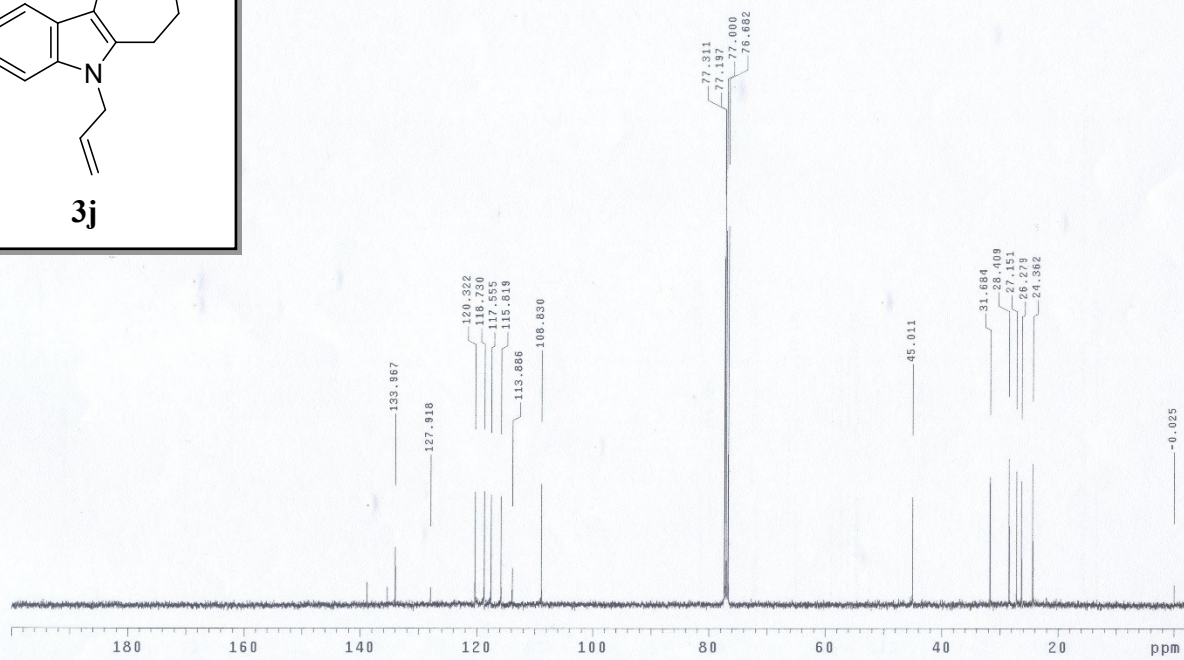

## Reference

1. B.-J. Peng, W.-T. Wu and S.-C. Yang, *Molecules*, 2017, **22**, 2097.
2. C.-Y. Chang, Y.-H. Lin and Y.-K. Wu, *Chem. Commun.*, 2019, **55**, 1116-1119.
3. R. K. Bramely, J. Caldwell and R. Grigg, *J. Chem. Soc., Perkin Trans. 1*, 1973, 1913-1921.
4. B.-J. Peng, W.-T. Hsueh, F. Fülöp and S.-C. Yang, *New J. Chem.*, 2019, **43**, 58-62.
